# Supplementary material for: Development of a New Tool for 3D Modeling for Regenerative Medicine
Source: Int J Biomed Imaging. 2011 Jun 13;2011:236854. doi: 10.1155/2011/236854 (PMC3132439; doi:10.1155/2011/236854)
Supplement: Supplementary file 1 — Video 1 and Video 2 showed the 3-D model of C57/BL6 mouse brain after the injection with HSVT0Z herpes simplex viral vector. The model allowed the detection the τ-Galactosidase stained (the tonality of X-Gal staining is blue and always greater than the general tonality of the brain section which is grey) and the identification of the signal position in all the brain areas. The 3-D model allows to appreciate the high distribution of the HSV-T0Z viral vector in brain area far-away from the site of injection, in both treated and untreated hemisphere and cerebellum (video.1). Further, in this model it is possible to merge the signal with the brain anatomical structureallowing the investigation of putative mechanisms involving the transgenic distribution (video.1, video.2). [file 236854.f1.zip]

Archive with 2 entries (2 files):
- 236854.f1/236854.f1.avi
- 236854.f1/236854.f2.avi
